# Supplementary material for: Collagen skin, a water-sensitive shape memory material
Source: Royal Society of Chemistry journal article supplement (doi:10.1039/c8tb01346b), 2018-01-01
Supplement: c8tb01346b1.pdf [file c8tb01346b1.pdf]

Electronic Supplementary Information:

## Collagen Skin, a Water-Sensitive Shape Memory Material

Yanting Han <sup>a</sup>, Jinlian Hu\* <sup>a</sup>, Lei Jiang <sup>b, c</sup>

<sup>a</sup> Institute of Textiles and Clothing, the Hong Kong Polytechnic University, Hung Hom, Kowloon, Hong Kong, China

<sup>b</sup> Laboratory of Bio-inspired Smart Interface Science, Technical Institute of Physics and Chemistry and Beijing National Laboratory for Molecular Science, Institute of Chemistry, Chinese Academy of Sciences, Beijing 100190, People's Republic of China

<sup>c</sup> Key Laboratory of Bio-Inspired Smart Interfacial Science and Technology of Ministry of Education, School of Chemistry and Environment, BeiHang University, Beijing 100191, People's Republic of China

\* Email: [jin-lian.hu@polyu.edu.hk](mailto:jin-lian.hu@polyu.edu.hk)

### Effect of thickness on mechanical properties of CS

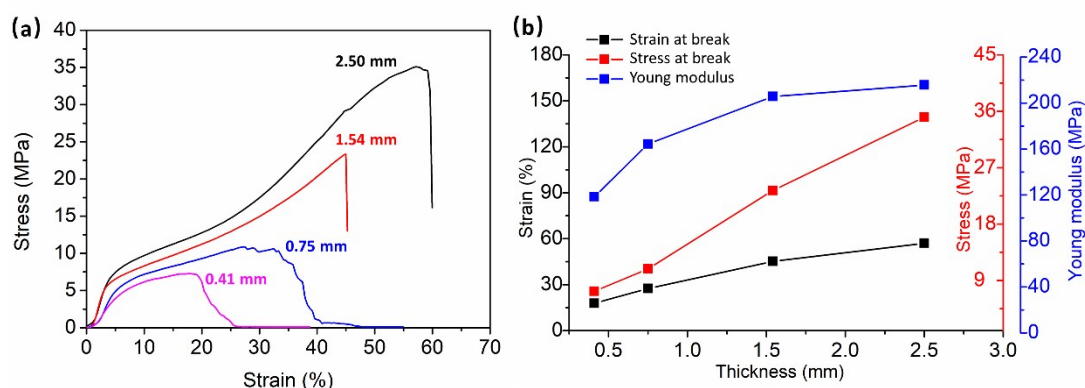

**Figure S1.** a) strain-stress curves of CS with different thickness; b) strain and stress at break, as well as Young modulus of CS as a function of thickness.

Original collagen skin has a thickness of 2.5 mm. Since thickness was reported to influence mechanical properties of nonwovens<sup>1</sup>, it is supposed that CS with natural fibrous structure may also exhibit same performance trend. To verify this, CS with different thickness (1,54 mm, 0.75 mm, 0.41 mm) was prepared by a splitting machine (LEPUSHOUGONG, China). The obtained samples were dried in fume hood at room temperature for 12 h to a constant weight. The moisture regain of samples were measured to be in the range of 10% to 15%. Mechanical properties were measured by

using Instron 5566 at an elongation rate of 10 mm/min. Results are shown in Figure S1. It can be seen that with reducing the thickness of CS, the mechanical properties of gradually decreased (Figure S1a). Particularly, when the thickness is less than 1 mm, strength and strain at break of CS decreased by over 60%. Such impairment may because that splitting processing damages the entangled collagen fiber network which are formed by natural growth, as a result, the loosen packing network of CS with thinner thickness can withstand excessive external force.

**Reference:**

1. A. Watanabe, M. Miwa and T. Yokoi, *Textile research journal*, 1999, **69**, 1-10.
